# Supplementary material for: Using Online 24-h Dietary Methodology to Validate the Psychometric Properties of a Dietary Scoring Tool with an International Sample of Adults Living with Multiple Sclerosis
Source: MDPI journal article supplement (doi:10.3390/nu14214568), 2022-10-31
Supplement: s1 [file s1]

**Supplementary Table S1:** Australian Food, Supplement, and Nutrient Database for Estimation of Population Nutrient Intakes 2011-2013 major food groups and examples

| Major food groups                            | Examples                                                                                                                           |
|----------------------------------------------|------------------------------------------------------------------------------------------------------------------------------------|
| Alcoholic beverages                          | Beers, wines, spirits, cocktails, liqueurs                                                                                         |
| Cereal based products and dishes             | Biscuits, cakes, muffins, pastries, pizza, burger, pancakes                                                                        |
| Cereals and cereal products                  | Bread, breakfast cereals, noodles, pasta, rice                                                                                     |
| Confectionery and cereal/nut/fruit/seed bars | Chocolate, muesli bar, fruit bar, lollies, chewing gum                                                                             |
| Dairy & meat substitutes                     | Soy beverages, tofu, tofu stir fry                                                                                                 |
| Egg products and dishes                      | Eggs, egg dishes such as scrambled eggs, omelet, mousse                                                                            |
| Fats and oils                                | Butter, margarine, oils                                                                                                            |
| Fish and seafood products and dishes         | Fresh fin fish, frozen fin fish, smoked fish, canned fish, prawn, squid, fish cake, tuna mornay with cheese, garlic prawn          |
| Fruit products and dishes                    | Apple, pear, berries, oranges, peaches, banana, melon, dried fruit, apple crumble                                                  |
| Legume and pulse products and dishes         | Soy beans, chickpeas, kidney beans, lentils, falafel, dhal                                                                         |
| Meat, poultry and game products and dishes   | Beef, veal, lamb, pork, chicken, sausage, bacon, ham, dried meats, crumbled meats, meat bolognaise pasta sauce, casserole, curries |
| Milk products and dishes                     | Milk, yoghurt, cream, cheese, ice cream, rice pudding, cheese cake                                                                 |
| Miscellaneous                                | Yeast, salt, intense sweeteners, herbs, stock, essences, gelatin, spreadable yeast extract                                         |
| Non-alcoholic beverages                      | Coffee, tea, fruit juice, cordial, soft drink, water, electrolyte drinks                                                           |
| Savoury sauces and condiments                | Gravies, savoury sauces, pickles, salad dressing                                                                                   |
| Seed and nut products and dishes             | Pumpkin seeds, linseed, sesame seed, peanuts, peanut butter, almond, coconut milk                                                  |
| Snack foods                                  | Potato crisps, popcorn, corn chips, pretzels                                                                                       |
| Soup                                         | Canned and homemade soup, dried soup mix                                                                                           |
| Special dietary foods                        | Liquid and powdered meal replacements, protein drinks and powders, oral supplement powder and beverages                            |
| Sugar products and dishes                    | Sugar, honey, jam, icing sugar, apple sauce, meringue                                                                              |
| Vegetable products and dishes                | Potatoes, cabbage, carrots, lettuce, beans, fresh herbs, tomato, pumpkin, sweetcorn, onion, salad                                  |

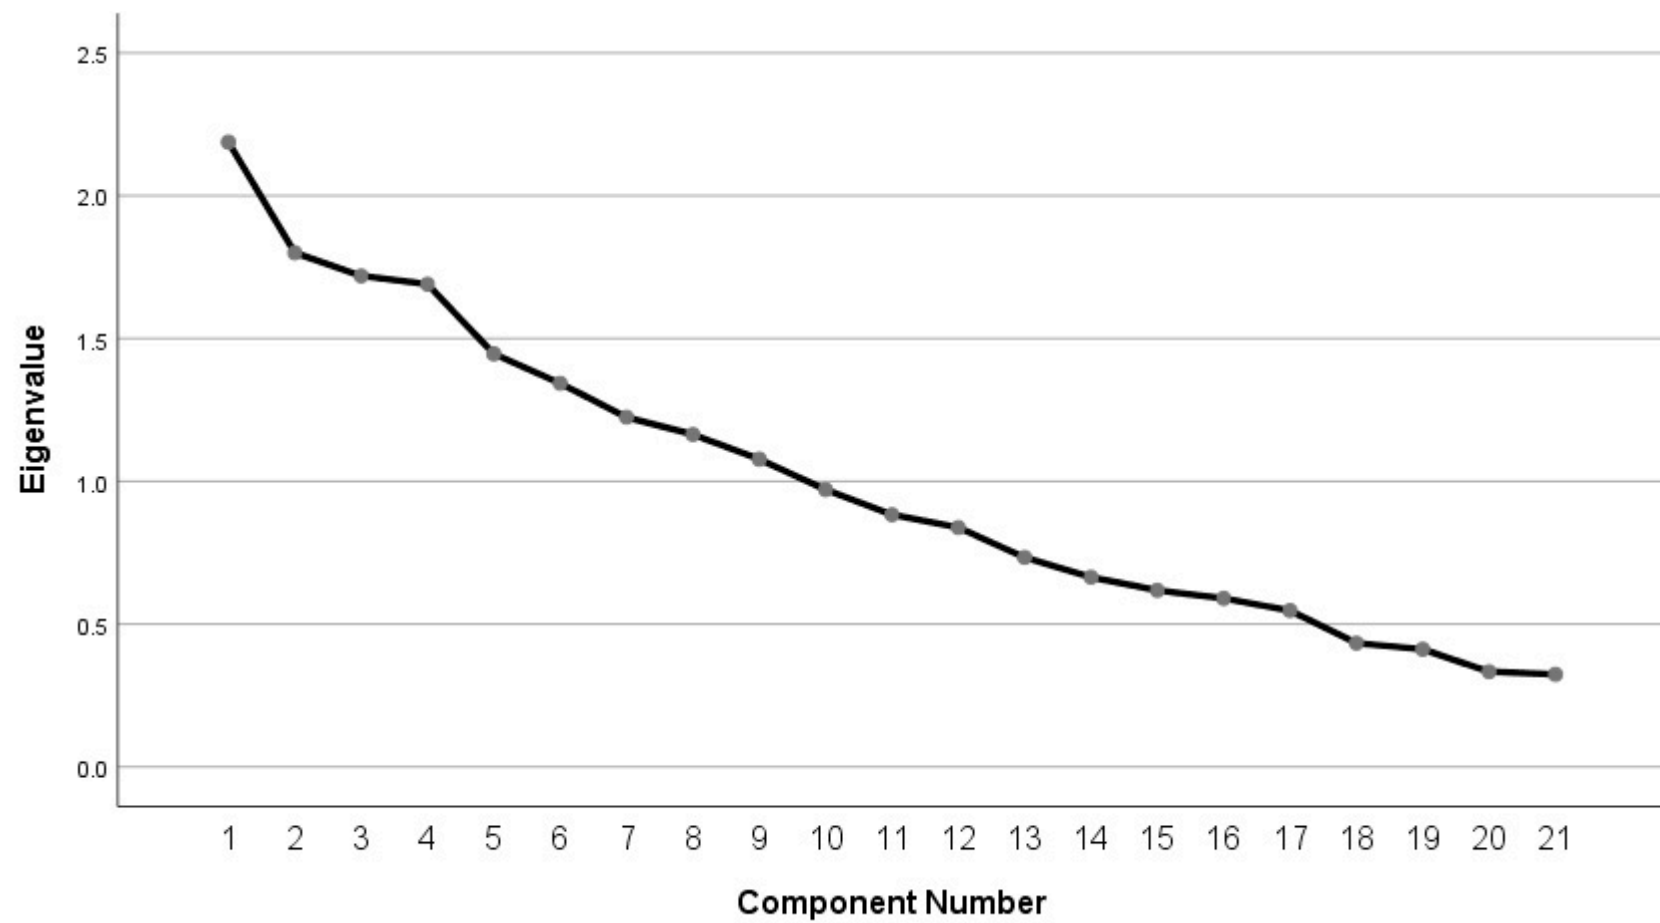

**Supplementary Figure S1:** Scree plot from principal components analysis of major food groups

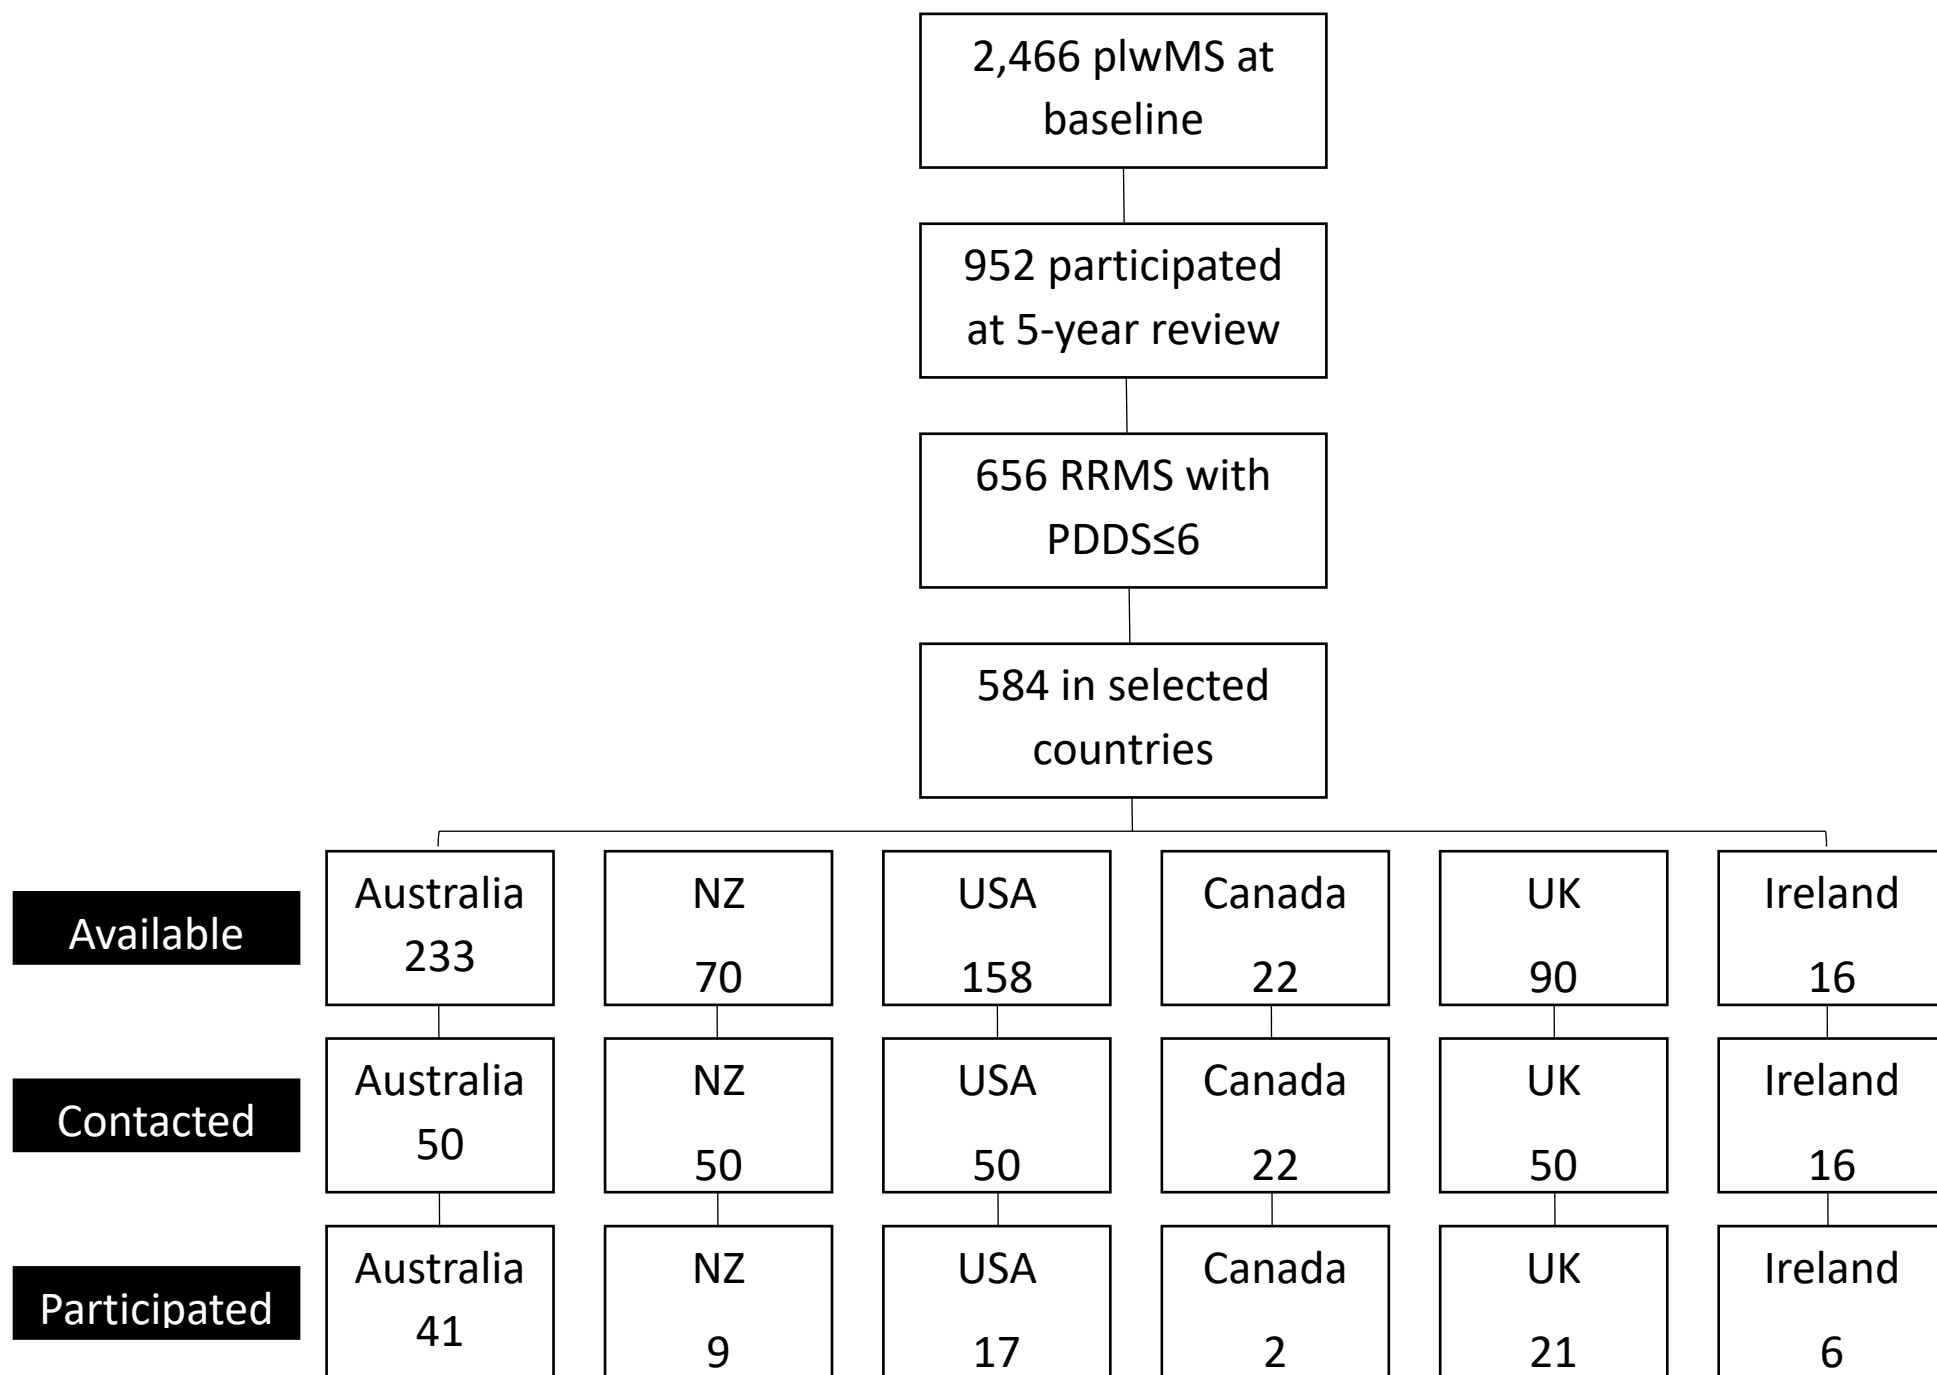

**Supplementary Figure S2:** Participants flow diagram

Abbreviations: MS: multiple sclerosis, plwMS Person living with MS, RRMS: relapsing remitting MS, PDDS: patient determined disease steps, NZ: New Zealand, USA: United States of America, UK: United Kingdom
